# Supplementary material for: Assessment of collagen content in fish skin – development of a flow analysis method for hydroxyproline determination
Source: Royal Society of Chemistry journal article supplement (doi:10.1039/d3ay01589k), 2023-01-01
Supplement: d3ay01589k1.pdf [file d3ay01589k1.pdf]

## Electronic Supplementary Information

### Assessment of collagen content in fish skin – development of a flow analysis method for hydroxyproline determination

Maria M. P. Melo, Raquel B. R. Mesquita, Ezequiel R. Coscueta, Manuela E. Pintado, António O. S. S. Rangel\*

*Universidade Católica Portuguesa, CBQF - Centro de Biotecnologia e Química Fina – Laboratório Associado, Porto, Portugal*

\* [arang@ucp.pt](mailto:arang@ucp.pt)

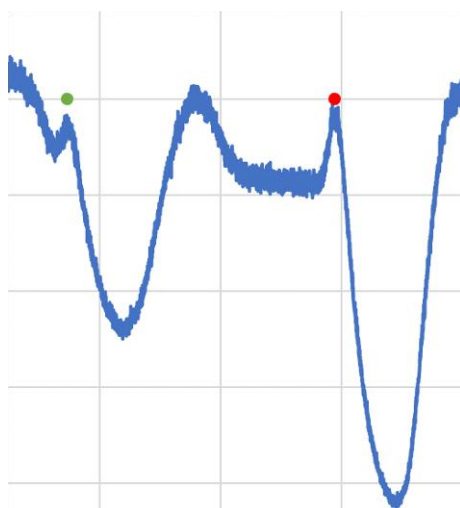

**ESI Fig. 1.** Register of the absorbance signal corresponding to two standards with different HYP concentration; the circles illustrate the variation in the baseline prior to the decrease in the absorbance signal for each standard, green for the 50 mg/L standard and red for the 100 mg/L standard.

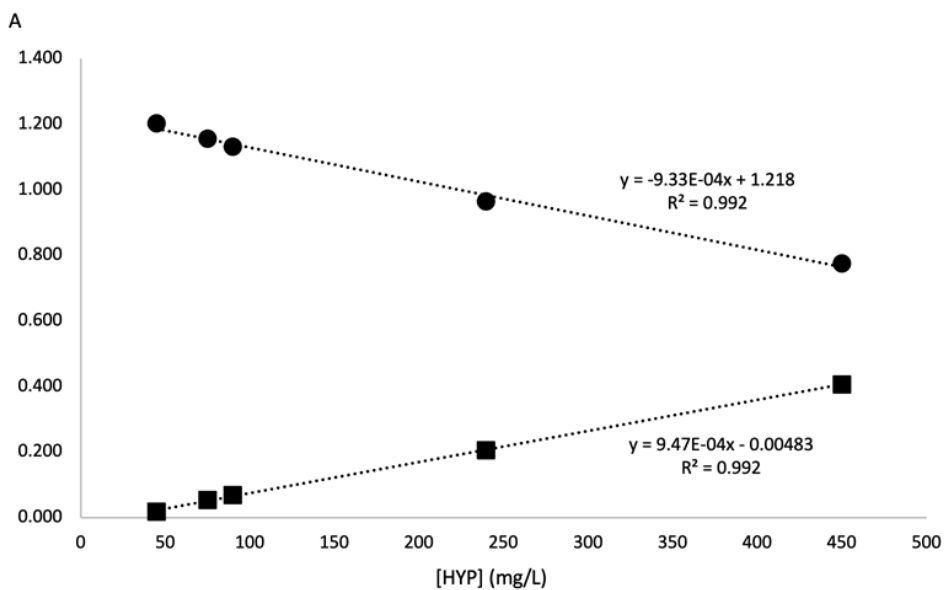

**ESI Figure 2.** Calibration curves obtained from the registered signal, with (circles) and without (squares) the subtraction of the baseline.

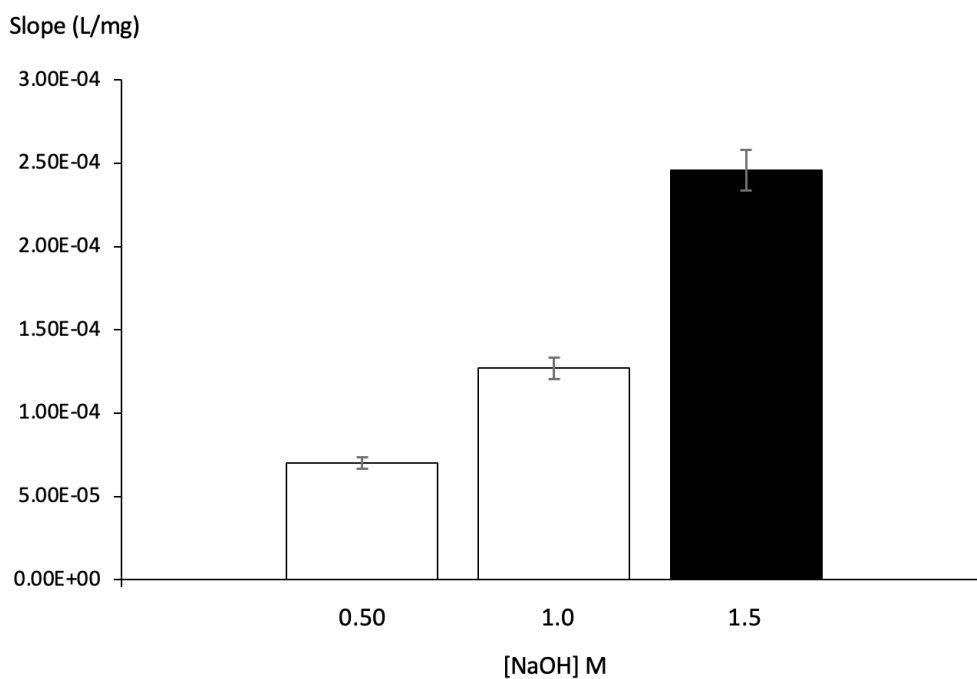

**ESI Fig. 3.** Study of the influence of the sodium hydroxide concentration in the calibration curve slope (method sensitivity); the bar in black represents the chosen hydroxide concentration; the error bars represent 10 % relative deviation.

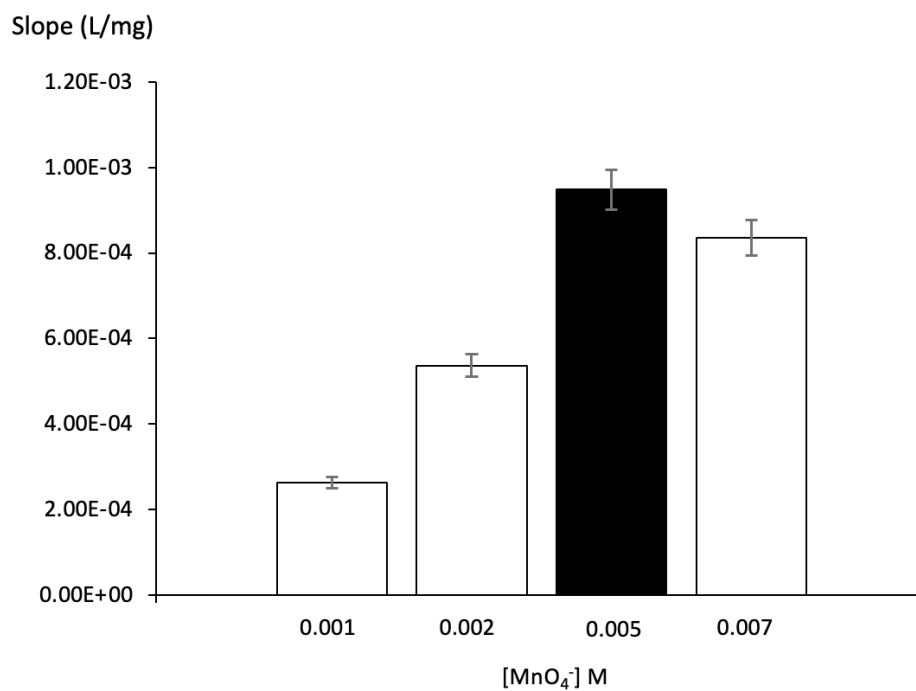

**ESI Fig. 4.** Study of the influence of the permanganate concentration in the calibration curve slope (method sensitivity); the bar in black represents the chosen concentration; the error bars represent 10 % relative deviation.
